# Supplementary material for: Intra-tumoral heterogeneity and immune responses predicts prognosis of gastric cancer
Source: publisher site journal article supplement (doi:10.18632/aging.202238), 2020-11-26
Supplement: Supplementary file [file aging-v12i23-202238-supplementary-material-SD1.pdf]

**SUPPLEMENTARY FIGURES**

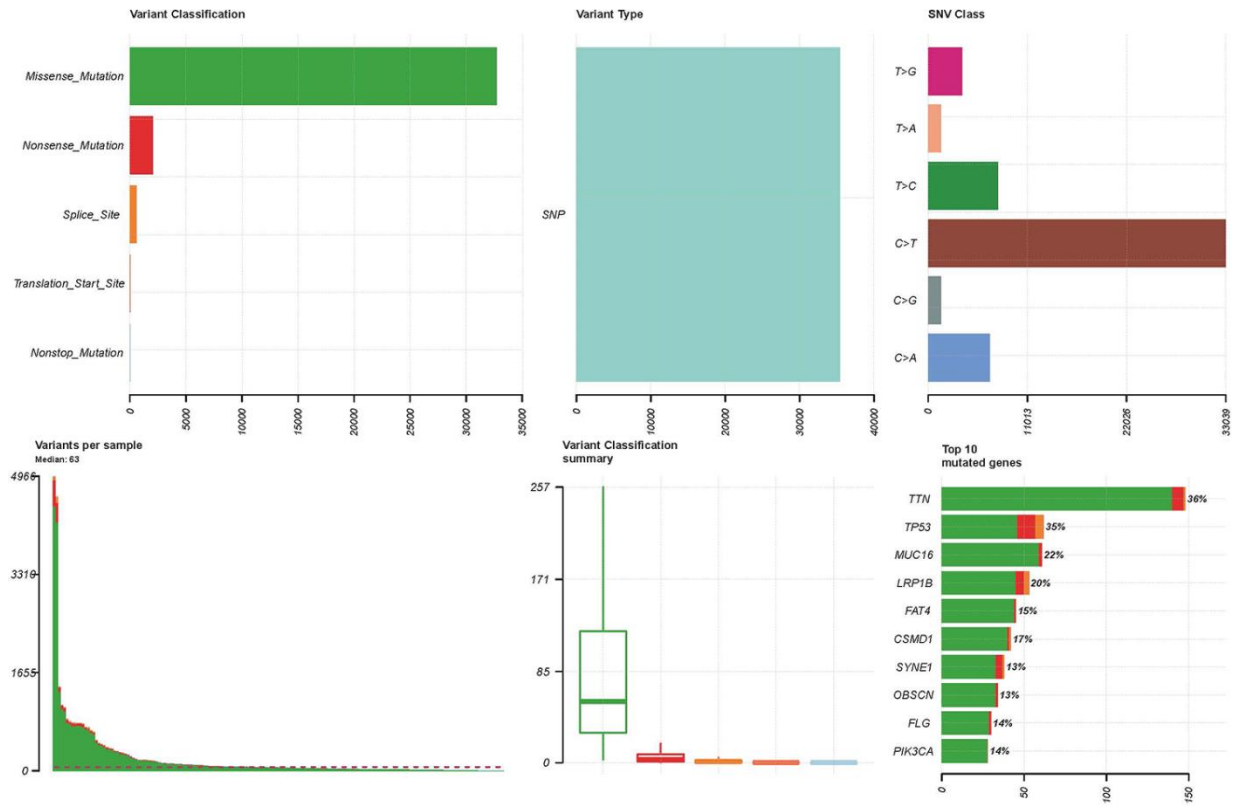

**Supplementary Figure 1. Summary of somatic mutations in 171 patients with gastric cancer.**

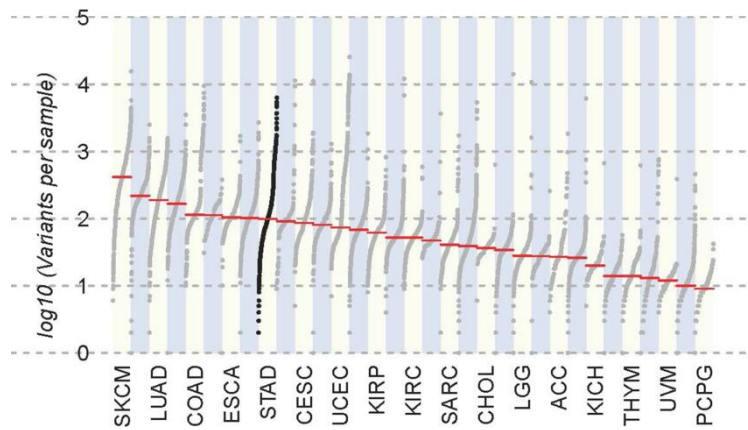

**Supplementary Figure 2. Mutation load of 31 cancer cohorts in TCGA database.**
